# Supplementary material
Source: Springer Nature journal article supplement (https://www.springermedizin.de/resource/supplementary/12936_2009_911_MOESM2_ESM.pdf/9548522)

**Haemoglobin**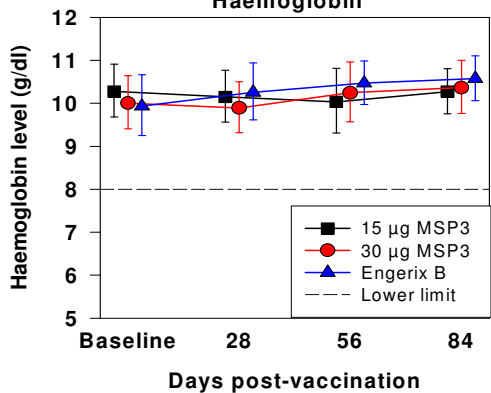**White blood cells**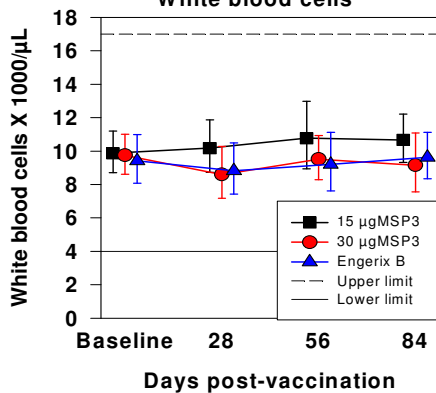**Platelets**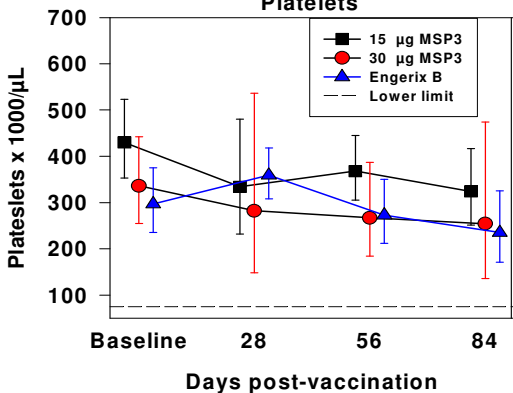**Alanine aminotransferase**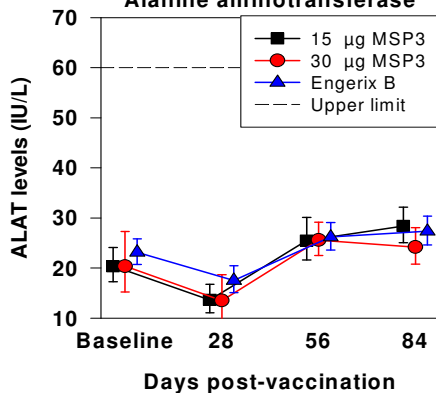**Creatinine**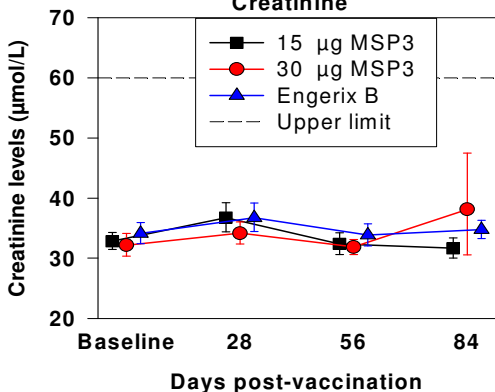

Supplement: MOESM2 [file 9548522]
